1 **Child Support Grant expansion and cognitive function**  
2 **among women in rural South Africa: findings from a**  
3 **natural experiment in HAALSI cohort**

4 Rishika Chakraborty<sup>1\*</sup>, Lindsay C. Kobayashi<sup>2</sup>, Janet Jock<sup>3</sup>, Coady Wing<sup>3</sup>, Xiwei  
5 Chen<sup>4</sup>, Meredith Phillips<sup>4</sup>, Lisa Berkman<sup>5</sup>, Kathleen Kahn<sup>6,7</sup>, Chodziwadziwa  
6 Whiteson Kabudula<sup>6</sup>, Molly Rosenberg<sup>4,6</sup>

7 <sup>1</sup>Department of Environmental and Occupational Health, Indiana University School of Public Health-  
8 Bloomington, Bloomington, Indiana, United States of America

9 <sup>2</sup>Department of Epidemiology, University of Michigan School of Public Health, Ann Arbor, Michigan,  
10 United States of America

11 <sup>3</sup>O'Neill School of Public and Environmental Affairs, Indiana University-Bloomington, Bloomington,  
12 Indiana, United States of America

13 <sup>4</sup>Department of Epidemiology and Biostatistics, Indiana University School of Public Health-  
14 Bloomington, Bloomington, Indiana, United States of America

15 <sup>5</sup>Harvard Center for Population and Development Studies, Cambridge, Massachusetts, United States of  
16 America

17 <sup>6</sup>MRC/Wits Rural Public Health and Health Transitions Research Unit (Agincourt), School of Public  
18 Health, Faculty of Health Sciences, University of the Witwatersrand, Johannesburg, South Africa

19 <sup>7</sup>INDEPTH Network, Accra, Ghana

20  
21 **\*Corresponding author:**

22 E-mail: [rchakra@iu.edu](mailto:rchakra@iu.edu) (RC)

## 23 **Abstract**

24 Cash transfers are a promising but understudied intervention that may protect cognitive function  
25 in adults by promoting their cognitive reserve. South Africa has a rapidly ageing population,  
26 however, less is known about the nature of association between cash transfers and cognitive  
27 function in this setting. We leveraged natural experiments from Child Support Grant (CSG) age-  
28 eligibility expansions to investigate the association between duration of CSG eligibility and  
29 cognitive function among biological mothers of child beneficiaries in South Africa. We analysed  
30 2014/2015 baseline data from 944 women, aged 40 - 59 years with at least one CSG-eligible  
31 child, enrolled in the HAALSI cohort in Agincourt, South Africa. Duration of CSG eligibility for  
32 each mother was calculated based on the birth dates of all their children and the CSG age  
33 eligibility expansion years. Cognitive function was measured using a cognitive battery  
34 administered to the mothers at baseline interview. Linear regression was used to estimate the  
35 association between duration of CSG eligibility, dichotomized as low ( $\leq 10$  years) and high ( $> 10$   
36 years) eligibility, and cognitive function z-scores of the mothers. Our study finds that high  
37 duration of CSG eligibility, compared to low, was associated with higher cognitive function z-  
38 scores in the full sample [ $\beta$ : 0.15 SD; 95% CI: 0.04, 0.26; p-value = 0.01]. In mothers with one to  
39 four lifetime children, but not five or more, high duration of CSG eligibility, compared to low,  
40 was associated with higher cognitive function z-scores [ $\beta$ : 0.19 SD; 95% CI: 0.05, 0.34, p-value  
41 = 0.02]. Government cash transfers given to support raising children may confer substantial  
42 protective effect on cognitive function of mothers in their mid-life. Further studies are needed to  
43 understand how parity may influence this relationship. Our findings bring evidence to  
44 policymakers for designing income supplementation programmes to promote healthy cognitive  
45 ageing in low-income settings.

46 **Keywords:** Child Support Grant; cognitive function; natural experiment; rural South Africa;  
47 cash transfers

48

## 49 **Introduction**

50 In 2018, nearly 50 million people worldwide were living with dementia and this number is  
51 projected to increase to 152 million by 2050. (1) Alzheimer’s disease and related dementias  
52 (ADRD) is one of the leading causes of disabilities, poor health, and decreased quality of life. (2)  
53 The burden of ADRD falls disproportionately on people living in low- and middle-income  
54 countries, where two-thirds of cases currently occur. (3) Largely due to changes in demographic  
55 patterns and population ageing, it is estimated that by 2050 there will be about 7.62 million  
56 people living with ADRD in sub-Saharan Africa. (4) Despite this growing public health concern,  
57 limited research exists on ADRD risk and prevention in sub-Saharan African countries like  
58 South Africa. (5, 6)

59

60 Prior evidence suggests that socioeconomic conditions throughout the life course shape the risk  
61 of ADRD in later life. (7-11) A diagnosis of ADRD is typically preceded by a prodromal period  
62 of at least five years of accelerated decline in cognitive function. (12) Socioeconomic status  
63 indicators across the life course such as education, occupation and income have been linked to  
64 cognitive outcomes in older adults. (13) These socioeconomic status indicators may be  
65 associated with later life cognitive function by providing individuals with assets or tools to attain  
66 resources that can promote healthy cognitive ageing. (8) For instance, higher income allows  
67 adults to access nutritious food and healthy housing, which can positively influence their later

68 life cognitive outcomes. In contrast, low income and/or lack of wealth may lead to chronic stress,  
69 which in turn can negatively affect their cognitive health. (8)

70  
71 The cumulative presence of socioeconomic advantages and thus cognitively stimulating  
72 exposures across the life course may have a protective effect on cognitive function and ADRD  
73 risk by promoting cognitive reserve. (14, 15) Cognitive reserve is a theoretical construct that is  
74 thought to improve the brain's ability to cope with pathological damage and can be accrued  
75 across one's life course. (14) Individuals with higher cognitive reserve may use their pre-existing  
76 neural networks more efficiently or may recruit compensatory mechanisms to perform a  
77 cognitive task, consequently coping better with brain pathology.(16) Socioeconomic status  
78 indicators, such as income, are considered proxy measures for cognitive reserve. (17) However,  
79 less is known about the nature of association between income and cognitive function in low-  
80 income settings, such as in rural South Africa. (5, 18)

81  
82 South Africa has a rapidly ageing population of people whose lives have been affected by  
83 structural racism during Apartheid from 1948 to 1994. (19) Since the end of Apartheid, South  
84 Africa has implemented several social protection programmes, the largest being the Child  
85 Support Grant (CSG). (20, 21) Implemented in 1998, the CSG is an unconditional cash transfer  
86 program designed to alleviate child poverty, offset the costs of raising children and improve their  
87 health and nutrition by providing financial assistance that supplements household income. (22)  
88 While the CSG is intended for the primary caregivers of the child beneficiaries, nearly 90 per  
89 cent of recipients are their biological mothers. (23, 24) When the CSG was first rolled out, only  
90 children under seven years were eligible. However, between 2003 and 2012, CSG eligibility has

91 been progressively expanded over time and currently, children under the age of 18 are eligible.  
92 (21) Prior research has shown that cash transfers similar to the CSG can raise living standards,  
93 improve health outcomes, and empower women within their households and communities. (25)  
94 CSG has been associated with several positive outcomes in child beneficiaries including  
95 alleviating food insecurity, improving education, school attendance, and anthropometric  
96 outcomes. (21) However, few studies have investigated the impact of CSG transfers on the  
97 caregivers and adults in the household. One study found CSG recipient mothers had a higher  
98 probability of being in the labor market and being employed, (26) while another reported adults  
99 in CSG recipient households had improved mental health. (27) Mothers of CSG recipients have  
100 also reported having higher financial independence, (28) decision making powers,(28, 29) lower  
101 worry and stress,(29) and improved social relationships within households and communities.(29)  
102  
103 What remains unclear is whether cash transfers like the CSG can impact cognitive function and  
104 ADRD risk in mid to later life adults. Since cash transfers supplement income, they may help  
105 accrue cognitive reserve, however, few studies have investigated the causal effects of cash  
106 transfers on ADRD risk. Only one study in Mexico (30) and another in United States(31) used  
107 natural experiments to demonstrate the causal effects of cash transfers in improving cognitive  
108 function in older adults. These studies found that higher social protection income led to  
109 substantial improvements in memory and other domains of cognitive function in older adults.  
110 (30, 31) However, the causal relationship between cash transfers and mid-to-later life cognitive  
111 function in adults from low-resource settings such as rural South Africa is uncertain.  
112

113 We thus aimed to exploit the exogenous variation in CSG eligibility, due to iterative age  
114 eligibility expansion policies, as a natural experiment to estimate the causal effect of cash  
115 transfers on cognitive function among biological mothers in South Africa. Based on the cognitive  
116 reserve theory, we hypothesized that a greater duration of CSG eligibility would improve mid-  
117 life cognitive function among mothers, since such exposure increases income, thereby promoting  
118 cognitive reserve. This study will contribute to the literature linking social protection policies  
119 and cognitive function in an underrepresented and rapidly ageing population in a middle-income  
120 country.

121

## 122 **Materials and methods**

### 123 **Study setting and design:**

124 This study is set in the rural Agincourt area of Bushbuckridge sub-district in Mpumalanga  
125 province, South Africa. Since 1992, the study area, currently consisting of 31 villages and  
126 approximately 116,000 inhabitants, has been under continuous surveillance through the  
127 Agincourt Health and Socio-Demographic Surveillance System (HDSS) run by the Medical  
128 Research Council/Wits University Rural Public Health and Health Transitions Research Unit.  
129 (19, 32) While the socioeconomic situation of the Agincourt population has improved post-  
130 Apartheid, the region still faces difficulties in accessing basic services, such as electricity and  
131 piped water.(19) This population is Human Immunodeficiency Virus hyperendemic (~20 per  
132 cent prevalence in 2010), (33) and has high unemployment rates. (19)

133

134 Cash transfers from social protection programmes, such as the CSG, are an important source of  
135 household income in the study region. (19) Primary caregivers of age-eligible children whose

136 income falls below a means-tested level (about 10 times the grant amount for single caregivers)  
137 are eligible to apply for the CSG. (21, 24) When the CSG was first introduced, uptake rates were  
138 low, with only 28 per cent of CSG-eligible households in Agincourt submitting a CSG  
139 application in 2001.(24) However, uptake rates and eligibility have increased over time and the  
140 CSG currently reaches over 1.1 million children in Mpumalanga province every month. (34)  
141 Since its implementation in 1998, the age eligibility was expanded from children under seven to  
142 under age nine in 2003, under age 11 in 2004, under age 14 in 2005, under age 15 in 2009, and  
143 through the age of 16 in 2010. Since 2012, children under the age of 18 have been eligible. (20,  
144 21) The grant payment has also increased over time to match inflation, from 100 Rand (~\$7  
145 USD) in 1998 to 480 Rand (~\$30 USD) in April 2022 per month for each child. (35)

146  
147 Using these CSG age eligibility expansions as natural experiments, we analysed baseline data  
148 collected in the 2014/15 ‘Health and Ageing in Africa: A Longitudinal Study of an INDEPTH  
149 Community in South Africa (HAALSI)’. (32) HAALSI is a longitudinal cohort study of 5059  
150 adults (2345 men and 2714 women) aged  $\geq 40$  years, representative of the Agincourt HDSS as its  
151 sampling frame (~86 per cent response rate). Trained, local fieldworkers collected household and  
152 individual data using computer assisted personal interviews. (32) All interviews were conducted  
153 in the local Xitsonga language with interview materials translated from English and back-  
154 translated for reliability.

155  
156 Ethical approval for HAALSI was obtained from the Wits University Human Ethics Committee  
157 (#M141159), the Harvard T. H. Chan School of Public Health Office of Human Research  
158 Administration (#13-1608), and the Mpumalanga Provincial Research and Ethics Committee.

159 Each HAALSI participant provided written informed consent prior to being interviewed.

160 Participants unable to read had a witness and used inked fingerprint to sign consent form. This

161 current study was deemed to be a ‘Not Human Subjects Research’ by the Institutional Review

162 Board of Indiana University Bloomington (protocol #2002584956) since the data was de-

163 identified prior to analysis.

164

### 165 **Study sample:**

166 Study participants were CSG-eligible women, defined as HAALSI women between the ages of

167 40 to 59 years who had at least one CSG-eligible biological child. We restricted our sample to

168 only biological mothers (excluding other female relatives/fathers/male relatives) since nearly 90

169 per cent of primary caregivers receiving the CSG are biological mothers of eligible children.(24)

170 After removing women who did not have any children (n=224), who did not have CSG-eligible

171 children (n=1363), and with implausible childbirth ages ( $\leq 10$  or  $\geq 60$  years old) (n=2), there were

172 1125 CSG eligible women in the HAALSI cohort. We then excluded women who were  $\geq 60$

173 years of age (n = 181) since this group may not be representative of other women in their later-

174 life in this rural South African setting and due to their small sample size. The older women

175 would have been at least 38 years old at the time of childbirth in order to have CSG-eligible

176 children, making their reproductive history fall outside the typical childbearing age which was

177 between 20 -34 years in South Africa in 1998. (36) Therefore, the final analytic sample included

178 944 CSG-eligible mothers (Fig 1).

179



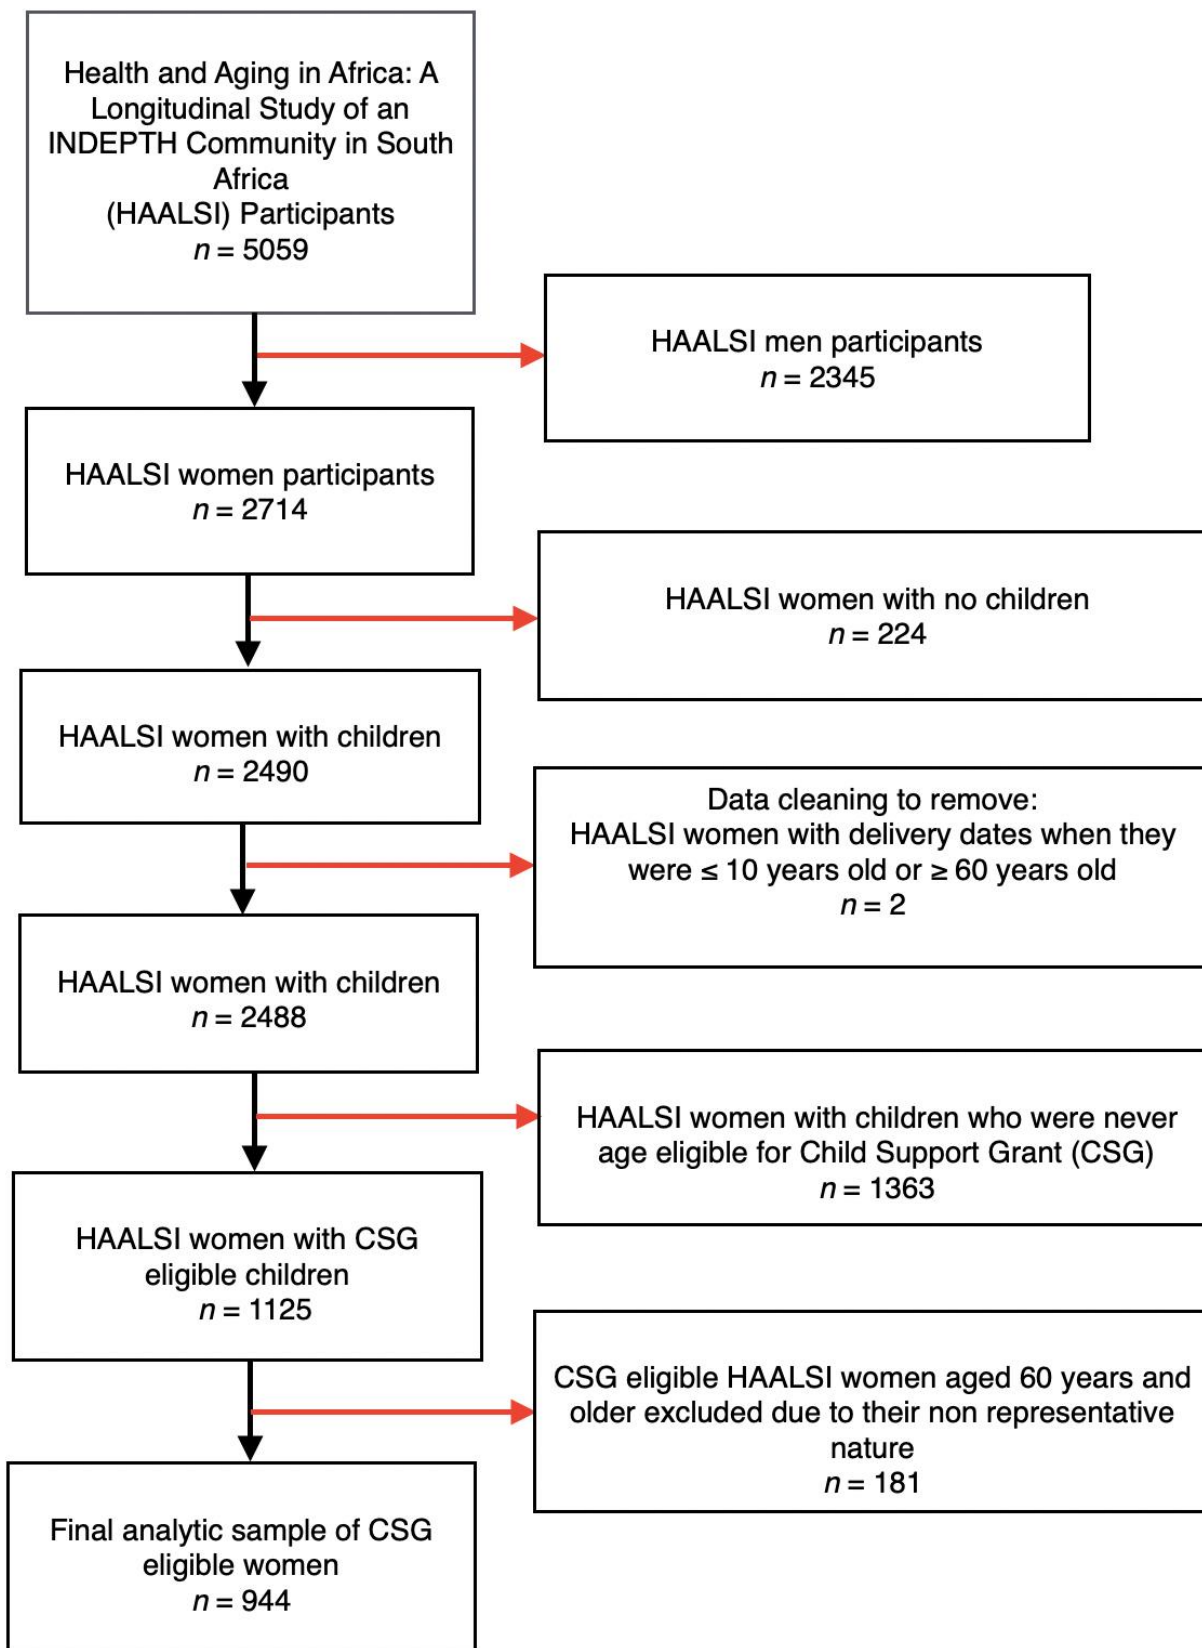

181 **Fig 1: Flowchart describing the cohort construction of 944 Child Support Grant eligible**  
182 **mothers enrolled in Health and Ageing in Africa: A Longitudinal Study of an INDEPTH**  
183 **Community in South Africa (HAALSI), 2014/15.**

184

185 **Study measures:**

186 **Exposure variable: Child Support Grant (CSG) eligibility**

187 The duration of CSG eligibility, in years, for each CSG-eligible mother was the exposure of  
188 interest. This was calculated based on the birth dates (month and year) of all their children and  
189 the CSG age-eligibility expansion years. We aggregated the potential years of CSG eligibility for  
190 each child beneficiary to calculate the total duration of CSG eligibility for the mothers. Take, for  
191 instance, a woman with two children, one born in January 1994 and the other born in January  
192 1995. Based on their birth dates and the expansions implemented between 2003 and 2012, the  
193 child born in 1994 will contribute 7.5 years of CSG eligibility, while the child born in 1995 will  
194 contribute 12.5 years of CSG eligibility by January 2016. Thus, for the mother, we would  
195 calculate a total CSG eligibility of 20 years at HAALSI baseline. An excel workbook showing  
196 our CSG eligibility calculation is included in our Supplementary Materials. Among women of  
197 the same age and with similar number of children, the variation in CSG eligibility duration  
198 plausibly leads to exogenous differences in CSG exposure over time. In contrast, the actual  
199 uptake of CSG benefits may be associated with individual risk factors or early outcomes such as  
200 education or high early life cognitive functioning that could confound the relationship between  
201 CSG and later outcomes.(37) Thus, in this paper, we focus on the “intent to treat” relationship  
202 between exogenous variation in years of CSG eligibility (adjusted for age, education, and  
203 number of children) and cognitive functioning.

204  
205 For current analysis, we categorized the duration of CSG eligibility into a binary variable:  $\leq 10$   
206 years (“low”) versus  $>10$  years (“high”). This choice of categorisation was informed by a data  
207 driven decision making, where we observed a threshold of higher cognitive function scores for  
208 mothers who had greater than 10 years of CSG eligibility compared to those who had less. We  
209 first mapped the relationship between all CSG eligibility years (as indicator variables) and  
210 cognitive function z-scores. To better understand the trend, we then grouped the CSG eligibility  
211 years into five-year intervals to visualize the same relationship. We observed that mothers with 1  
212 to 5 years and 5.5 to 10 years of CSG eligibility duration had similar cognitive function scores  
213 while those with greater than 10 years had relatively higher cognitive function scores. Given this  
214 observation, we decided to use 10 years of CSG eligibility as our threshold for analysis (the CSG  
215 variable construction process has been described in further details under Child Support Grant  
216 Variable Construction in our Supplementary Materials). We also conducted several sensitivity  
217 analyses using CSG as a continuous variable and with different cut-offs for duration of CSG  
218 eligibility to assess the robustness of this threshold (Please see Sensitivity Analysis, S1 to S3  
219 Tables, in our Supplementary Materials).

220  
221 **Outcome variable: cognitive function**  
222 A cognitive battery was administered in the HAALSI study interview, which included measures  
223 of orientation (ability to correctly state the date, month, year, and South African President; 4  
224 points total) and episodic memory (immediate and delayed recall of ten words that were read out  
225 loud by the interviewer; 20 points total).(38) These measures were selected for use as the  
226 inability to orient oneself in time and place and loss of episodic memory are hallmark symptoms

227 of ADRD, and are highly sensitive to ageing-related change. (39) This cognitive battery was  
228 adapted from the United States Health and Retirement Study (US HRS) and has been used in  
229 other HRS International Partner Studies around the world. (40, 41) For present analysis, we used  
230 the continuous z-standardized score of the 24-point composite score (with mean 0 and standard  
231 deviation 1). (38)

232

### 233 **Sociodemographic variables**

234 The sample of CSG-eligible mothers was described according to their age at the time of the  
235 HAALSI baseline interview and CSG implementation (years), number of CSG-eligible children,  
236 lifetime number of children (one to four, and five and more), education (none, some primary, and  
237 some secondary or more), marital status (never married/ separated/divorced/widowed, and  
238 currently married), religion (none, Christianity, and African traditional), country of origin (South  
239 Africa, and Mozambique/other), and wealth index quintiles (based on household characteristics  
240 and ownership of vehicles, livestock and household items).(32)

241

### 242 **Statistical analysis:**

243 CSG-eligible mothers were stratified into two groups according to their number of lifetime  
244 children, one to four and five and more children, since the number of lifetime children is  
245 structurally linked to higher duration of CSG eligibility. This categorization was chosen to  
246 distinguish those with grand multiparity of five and more births. (42) For descriptive analysis, we  
247 used Chi-square tests and Mann Whitney U tests for categorical and continuous variables,  
248 respectively. Ordinary Least Square regression models were used to estimate the association  
249 between duration of CSG eligibility and cognitive function z-score, first in the full sample, and

250 then stratified by lifetime number of children subgroups. All models were adjusted for age of  
251 mother (as a linear and a quadratic term), education (as none, some primary, some secondary or  
252 more) and lifetime number of children indicator variables. Statistical analyses were conducted  
253 using R statistical software (version 3.6.0, Vienna, Austria). Threshold for significance was  
254 defined as p value < 0.05.

255

## 256 **Results**

257 Characteristics of the sample have been described in Table 1. In the full sample, the median  
258 duration of CSG eligibility for the mothers was 26.25 years (IQR: 16 to 41 years, Range: 1 to  
259 98.5 years). These years of eligibility could be simultaneously accrued over multiple children,  
260 with the median number of CSG eligible children in the full sample being 2 (IQR: 1 to 3  
261 children, Range: 1 to 9 children). The median age of the mothers at the time of the study  
262 interview was 50 years (IQR: 44 to 54 years, Range: 40 to 59 years) while at the time of CSG  
263 implementation in 1998, the median age was 34 years (IQR: 28 to 38 years, Range: 24 years to  
264 43 years). Over four-fifths (86 per cent, 808/944) of the full sample had high duration of CSG  
265 eligibility (>10 years). About four-fifths (84 per cent, 328/390) of the mothers with one to four  
266 lifetime children and 87 per cent (480/554) of the mothers with five and more lifetime children  
267 had high duration of CSG eligibility. Approximately one-third of the mothers (~59 per cent,  
268 554/944) had five or more lifetime number of children. Around one-third (~35 per cent, 329/944)  
269 of the mothers had received some secondary or higher education and over half (~55 per cent,  
270 515/944) were currently married. About two-thirds of the mothers (69 per cent, 651/944) were  
271 originally from South Africa, and majority (95 per cent, 901/944) were Christian (Table 1).  
272 Some sociodemographic characteristics significantly differed across the mothers according to

273 their CSG eligibility status (Table 1). Mothers with high duration of CSG eligibility were  
 274 younger and had more CSG eligible children than mothers with low duration of CSG eligibility.  
 275 Mothers with high duration of CSG eligibility were marginally more likely to have achieved  
 276 some secondary or higher education compared to their counterparts with low duration of CSG  
 277 eligibility. No meaningful differences by duration of CSG eligibility were observed for lifetime  
 278 number of children, marital status, country of origin, religion, and wealth index.

279  
 280  
 281 **Table 1: Sociodemographic characteristics of Child Support Grant eligible mothers**  
 282 **according to low ( $\leq 10$  years) and high ( $> 10$  years) duration of Child Support Grant**  
 283 **eligibility, Health and Ageing in Africa: A Longitudinal Study of an INDEPTH Community**  
 284 **in South Africa, 2014/15**

| Characteristics                              | Overall Sample<br>N = 944 | Low CSG*<br>duration<br>N = 136 | High CSG duration<br>N = 808 | P value |
|----------------------------------------------|---------------------------|---------------------------------|------------------------------|---------|
| <i>Continuous variables [Median (IQR**)]</i> |                           |                                 |                              |         |
| Number of CSG eligible children              | 2 (1, 3)                  | 1 (1,1)                         | 3 (2,4)                      | <0.001  |
| Mother's age in 2014/15                      | 50 (44, 54)               | 54 (51, 57)                     | 49 (43, 53)                  | <0.001  |
| Mother's age in 1998 (CSG implementation)    | 34 (28, 38)               | 38 (35, 41)                     | 33 (27, 37)                  | <0.001  |
| <i>Categorical variables [N (%)]</i>         |                           |                                 |                              |         |
| <b>Lifetime Number of Children</b>           |                           |                                 |                              |         |
| 1 to 4 children                              | 390 (41.3)                | 62 (45.6)                       | 328 (40.6)                   | 0.27    |
| 5 and more children                          | 554 (58.7)                | 74 (54.4)                       | 480 (59.4)                   |         |
| <b>Education</b>                             |                           |                                 |                              |         |
| None                                         | 275 (29.1)                | 47 (34.6)                       | 228 (28.2)                   | 0.05    |
| Some Primary schooling                       | 340 (36.0)                | 54 (39.7)                       | 286 (35.4)                   |         |
| Secondary or more schooling                  | 329 (34.9)                | 35 (25.7)                       | 294 (36.4)                   |         |
| <b>Marital status</b>                        |                           |                                 |                              |         |
| Currently married                            | 515 (54.6)                | 65 (47.8)                       | 450 (55.7)                   | 0.09    |
| Other <sup>^</sup>                           | 429 (45.4)                | 71 (52.2)                       | 358 (44.3)                   |         |
| <b>Country of origin</b>                     |                           |                                 |                              |         |
| South Africa                                 | 651 (69.0)                | 94 (69.1)                       | 557 (68.9)                   | 0.98    |
| Mozambique or                                | 292 (31.0)                | 42 (30.9)                       | 250 (30.9)                   |         |

other

**Religion**

|                     |            |            |            |      |
|---------------------|------------|------------|------------|------|
| None                | 28 (3.0)   | 2 (1.5)    | 26 (3.2)   | 0.17 |
| Christianity        | 901 (95.4) | 134 (98.5) | 767 (94.9) |      |
| African Traditional | 15 (1.6)   | 0          | 15 (1.9)   |      |

**Wealth Index**

|                      |            |           |            |      |
|----------------------|------------|-----------|------------|------|
| Quintile 1 (lowest)  | 180 (19.1) | 19 (14.0) | 161 (20.0) | 0.36 |
| Quintile 2           | 179 (19.0) | 26 (19.1) | 153 (18.9) |      |
| Quintile 3           | 172 (18.2) | 22 (16.1) | 150 (18.6) |      |
| Quintile 4           | 192 (20.3) | 33 (24.3) | 159 (19.7) |      |
| Quintile 5 (highest) | 221 (23.4) | 36 (26.5) | 185 (22.9) |      |

285 \*CSG : Child Support Grant; \*\*IQR: Inter Quartile Range; ^ never married/separated or divorced/widowed

286

287 In the full sample, in unadjusted analysis, high duration of CSG eligibility was associated with  
 288 higher cognitive function z-scores in the mothers ( $\beta = 0.27$  SD units, 95 per cent CI: 0.11, 0.43).  
 289 After adjustment for mother's age, education and lifetime number of children, the magnitude of  
 290 the observed association was attenuated (adjusted  $\beta = 0.15$  SD units, 95 per cent CI: 0.04, 0.26;  
 291 Table 2, Fig 2). In subgroup analyses, high duration of CSG eligibility was associated with  
 292 higher cognitive function z-scores only among mothers with one to four children ( $\beta = 0.37$  SD  
 293 units, 95 per cent CI: 0.12, 0.62). This magnitude of this association was also attenuated after  
 294 covariate adjustment (adjusted  $\beta = 0.19$  SD units, 95 per cent CI: 0.05, 0.34; Table 2, Fig 2). In  
 295 mothers with five or more children, unadjusted analysis indicated that high duration of CSG  
 296 eligibility may be associated with higher cognitive function ( $\beta = 0.21$  SD units, 95 per cent CI:  
 297 0.003, 0.41), but no meaningful associations between duration of CSG eligibility and cognitive  
 298 function z-scores were observed in adjusted analyses (Table 2).

299

300 **Table 2: Estimated effects of high Child Support Grant eligibility (>10 years) compared to**  
 301 **low Child Support Grant eligibility ( $\leq 10$  years) on cognitive function in Child Support**  
 302 **Grant-eligible mothers, Health and Ageing in Africa: A Longitudinal Study of an**  
 303 **INDEPTH Community in South Africa, 2014/15**

| Analytic Sample                                          | Beta Coefficient ( $\beta$ ) | 95% Confidence Intervals | P value |
|----------------------------------------------------------|------------------------------|--------------------------|---------|
| <b>Full Sample (n= 944)</b>                              |                              |                          |         |
| Unadjusted                                               | 0.27                         | 0.11, 0.43               | <0.001  |
| Adjusted <sup>a</sup>                                    | 0.15                         | 0.04, 0.26               | 0.01    |
| <b>Lifetime number of children 1 to 4 (n = 390)</b>      |                              |                          |         |
| Unadjusted                                               | 0.37                         | 0.12, 0.62               | <0.01   |
| Adjusted <sup>b</sup>                                    | 0.19                         | 0.05, 0.34               | 0.02    |
| <b>Lifetime number of children 5 and above (n = 554)</b> |                              |                          |         |
| Unadjusted                                               | 0.21                         | 0.003, 0.41              | 0.05    |
| Adjusted <sup>b</sup>                                    | 0.11                         | -0.07, 0.30              | 0.21    |

304 <sup>a</sup> Adjusted for mother’s age and age squared, education (none, some primary, some secondary and more) and  
 305 lifetime number of children (indicator variables)  
 306 <sup>b</sup> Adjusted for mother’s age and age squared, education (none, some primary, some secondary and more) and with  
 307 lifetime number of children (indicator variables), within each lifetime children subgroup  
 308

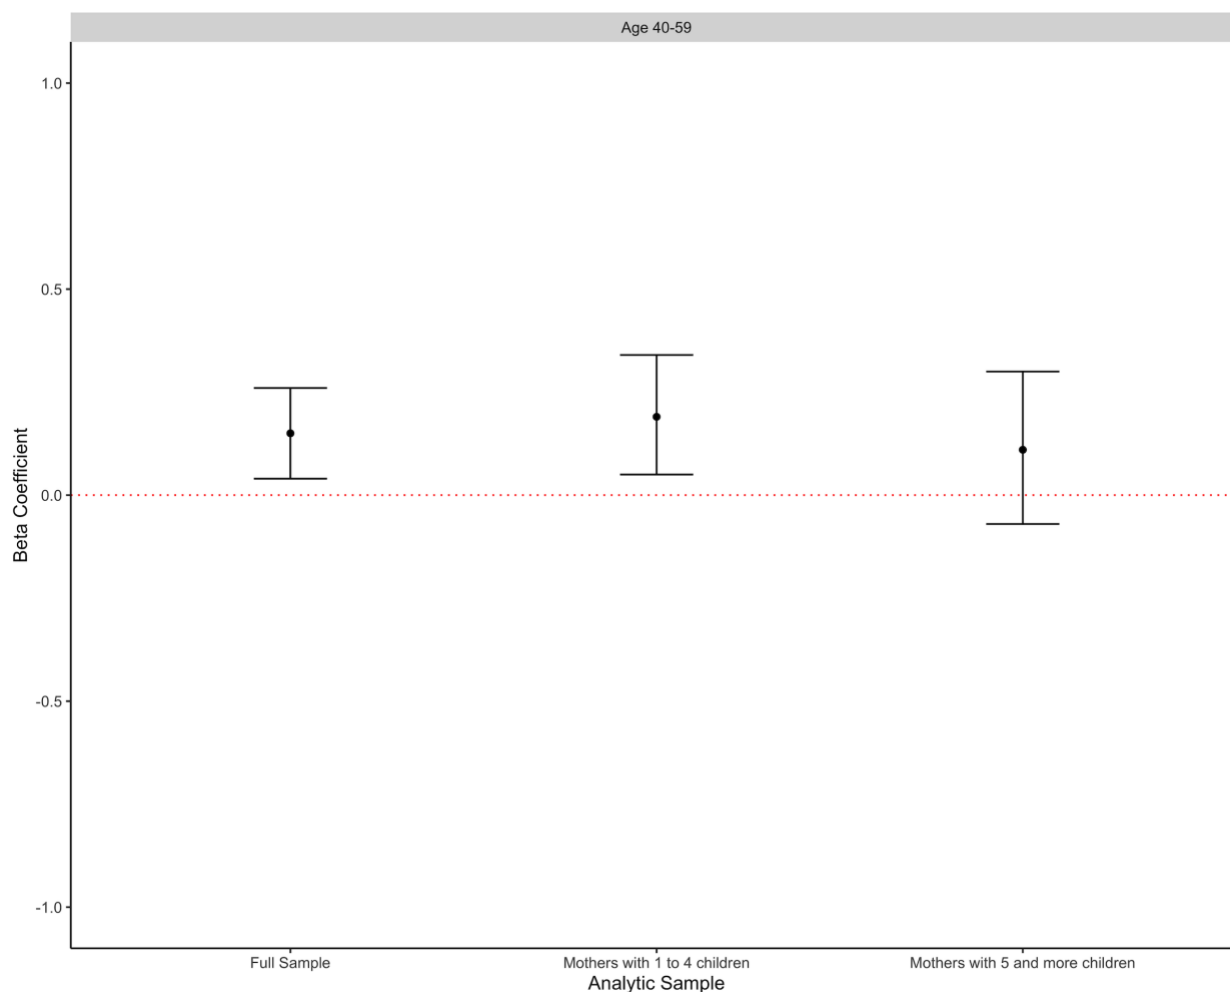



310 **Fig 2: Adjusted<sup>a</sup> estimates from Ordinary Least Squares regression models of the cognitive**  
311 **function in Child Support Grant (CSG)-eligible mothers who had high versus low duration**  
312 **of CSG eligibility in the three analytic samples.**

313 **<sup>a</sup>Adjusted for mother’s age, mother’s age squared, mother’s education and lifetime number**  
314 **of children (indicator variables)**

315  
316 In our sensitivity analyses, we analysed CSG in three ways: a) as a continuous variable and  
317 dichotomized the years of CSG eligibility using two different thresholds near the 10-year cut-off,  
318 b) one at 8 years and c) another at 12 years (Supplementary Materials: Sensitivity Analysis). As  
319 a continuous variable, duration of CSG eligibility was not associated with cognitive function z-  
320 scores after adjusting for mother’s age, education, and lifetime number of children  
321 (Supplementary Materials, S1 Table). When dichotomizing duration of CSG eligibility as  $\leq 8$   
322 years (“low”) versus  $>8$  years (“high”), the association between duration of CSG eligibility and  
323 cognitive function z-scores for the full sample and subgroups were similar in magnitude and  
324 precision to the main analysis conducted with the 10-year cut-off (Supplementary Materials, S2  
325 Table). When dichotomizing duration of CSG eligibility as  $\leq 12$  years (“low”) versus  $>12$  years  
326 (“high”), no association was observed between duration of CSG eligibility and cognitive  
327 function z scores in the full sample and in the lifetime number of children subgroups in adjusted  
328 analyses.

329

## 330 **Discussion**

331 In this study of mothers in a rural, low-income South African population, we found that a higher  
332 duration of eligibility for Child Support Grant was associated with higher subsequent cognitive

333 function z-scores among mothers between ages 40-59 years. We also found that in mothers with  
334 one to four children in their lifetimes, CSG eligibility duration was associated with higher  
335 subsequent cognitive function z-scores. The magnitude of these associations was substantial. In  
336 our full sample, for every 5-year increase in age, cognitive function z score lowered by an  
337 average of 0.18 SD units. Therefore, our study results suggest that over 10 years of eligibility for  
338 regular government cash transfers for child support in this group of mothers in their mid-life was  
339 equivalent to a nearly 5-year reduction in their cognitive ageing.

340  
341 Only two other studies that we are aware of have used natural experiments to evaluate the causal  
342 effects of cash transfers on cognitive function in older adults. (30, 31) In Mexico, cash transfers  
343 given to adults aged  $\geq 70$  years improved immediate and delayed recall scores with magnitudes  
344 that were equivalent to reductions in cognitive ageing of 5.5 and 12.4 years, respectively. (30) In  
345 the United States, cash transfers from social security income were associated with clinically  
346 meaningful improvements in multiple domains of cognitive function in older adults. (31) While  
347 our sample comprised women from a low-income, rural South African setting, our findings are  
348 consistent with the results from Mexico and United States. We considered cognitive function  
349 across an earlier age range than had been examined in prior work by focusing on South African  
350 women in their mid-life. Cognitive decline can start during the middle years of adulthood and  
351 progressively worsen in later life (43, 44), potentially leading to ADRD. (12) Early detection of  
352 cognitive function changes in mid-life may help support interventions to delay or prevent ADRD  
353 onset.

354

355 A potential mechanism through which cash transfers may exert protective effects on mid- life  
356 cognitive function is via promoting cognitive reserve. (16) Accrual of cognitive reserve is  
357 thought to occur over the life course through cumulative cognitively stimulating experiences  
358 from childhood through adulthood. (16, 45, 46) People with high cognitive reserve are thought to  
359 be able to use compensatory behavioral or neural brain mechanisms to stave off the functional  
360 impacts of ageing-related brain pathology. (16, 45) In South Africa, CSG benefits account for  
361 nearly 40 per cent of income in the poorest CSG recipient households and are accumulated over  
362 time in early- to mid-adulthood for mothers while they are raising children. (20, 22) Increased  
363 income, especially when sustained over time, can alleviate poverty, improve living conditions,  
364 reduce stress, and improve nutrition and health, (21, 22) all of which may build cognitive  
365 reserve.(47) Prior research has shown that since the mothers were primary CSG recipients, they  
366 had a strong role in making financial decisions regarding the use of CSG benefits. (22, 48) It is  
367 possible that mother’s economic empowerment within the household may be protective of their  
368 cognitive health. Furthermore, the CSG also strengthened social support for the mothers via  
369 improved relationships with neighbors in the community and enabling them to participate in  
370 *stokvels*, which is a rotating savings and credit association.(29) High social support and social  
371 engagement is protective against cognitive ageing, particularly in adults in their mid-life.(49, 50)  
372 This may be due to them engaging in complex relationships and a feeling a sense of belonging  
373 and dignity in the community.(51) Another potential pathway to accrue cognitive reserve might  
374 have been expanding access to education in adolescent mothers who might still be in school at  
375 the time of CSG implementation. However, in our study sample, the youngest mothers were at  
376 least 24 years old in 1998, when CSG was first implemented. Therefore, their opportunities for  
377 expanding education might have closed by the time their children were CSG eligible. So, higher

378 education levels might not plausibly explain the observed association between CSG and  
379 cognitive function in this group of mothers. Future research is needed to better understand the  
380 mechanisms through which improving the financial circumstances and independence of low-  
381 income middle-aged mothers may improve their cognitive health as they age.

382  
383 We did not observe an association between higher duration of CSG eligibility and cognitive  
384 function in mothers with grand multiparity (with five or more children). Prior studies have found  
385 grand multiparity to be strongly associated with cognitive impairment and ADRD risk, which  
386 may overwhelm any protective effects of CSG eligibility for these women.(52, 53) Grand  
387 multiparity may result in decreased estrogen levels,(54) long-term parenting stress,(55) and  
388 increased risk of cardiovascular diseases,(56) all of which can contribute to cognitive decline.

389 (55) Our sample of rural South African women with a median of five lifetime number of children  
390 represented a relatively high fertility setting. There is scarce research on the association between  
391 parity and cognitive ageing in this setting and there may be unknown sociodemographic,  
392 socioeconomic, or psychosocial factors that mediate or moderate this relationship. Prior work  
393 using data from Agincourt HDSS found that the receipt of CSG had not motivated women to  
394 have more children.(57) Future studies are planned to investigate the relationships between  
395 reproductive history and cognitive ageing outcomes in the HAALSI cohort.

396  
397 The findings from our sensitivity analysis suggest the use of the 10-year threshold may be  
398 adequate. As a continuous variable, duration of CSG eligibility was not associated with cognitive  
399 function. It is plausible that a difference of one year of CSG eligibility is likely too little in  
400 duration and financial amounts to have had any meaningful impacts on the cognitive function of

401 the mothers. When using the 8-year cut-off, our results were similar to the main analysis,  
402 suggesting that higher duration of CSG eligibility may be protective of the cognitive health of  
403 mothers with fewer children but not for those with grand multiparity. However, when we used  
404 the 12-year cut-off, we observed no association between CSG eligibility and cognitive function,  
405 suggesting that the cut-off greater than 10 may be too high to detect any relationships between  
406 CSG eligibility and cognitive function.

407  
408 Several aspects of the experimental design and data structure warrant careful interpretation of the  
409 results. Cognitive function was measured at a single point in time, and we could not assess  
410 within-person cognitive change over time or incidence of cognitive impairment or dementia. We  
411 utilized duration of CSG eligibility and not actual CSG receipt in our analyses. So, the true  
412 relationship between CSG receipt and cognitive function may be different from our findings. As  
413 the current cohort ages, studies using extended follow-up in HAALSI have been planned which  
414 will allow us to track cognitive change during ageing among the middle-aged women in the  
415 current sample. We did not have cognitive function measures in domains other than orientation  
416 and episodic memory. Future studies should investigate other domains, such as executive  
417 function, language, or processing speed to gain a comprehensive understanding of whether and  
418 how cash transfers affect different domains of cognitive function. Longitudinal studies with large  
419 sample sizes and actual CSG receipt data are necessary to elucidate the relationship between cash  
420 transfers and cognitive decline in South African women in their later-life. It is critical to know  
421 how long any cognitive health benefits of the CSG received in early- to mid-adulthood may last  
422 as beneficiaries age. Finally, our study findings may have limited generalizability outside of a  
423 rural South African setting.

424  
425 This study has several strengths. We used data from a population-representative sample in a  
426 setting that is under-represented in the global dementia evidence base.(32) We used a quasi-  
427 randomized exposure variable for duration of CSG eligibility based on the CSG age-eligibility  
428 expansions and children’s birth timings. This approach has also been used in previous research.  
429 (27, 58) Since the increases in CSG amount over time was to match inflation and not to increase  
430 in value, the duration of CSG eligibility was considered an adequate proxy for CSG receipt. This  
431 approach allowed us to avoid recall or social desirability bias that can occur when self-reports  
432 are used or confounding by individual uptake patterns. This design strengthens causal inference  
433 for the association between CSG eligibility and mid- life cognitive function. We used validated  
434 and reliable measures of cognitive function, which are harmonized with those used in the US  
435 HRS and its International Partner Studies around the world and are meaningful for ADRD risk.  
436 (40) To the best of our knowledge, this is the first study examining the causal effects of cash  
437 transfer eligibility on mid- life cognitive function of mothers in a rural South African setting. Our  
438 findings bring evidence to policymakers for designing social protection plans that promote  
439 healthy cognitive ageing in mothers from rural, low-income settings.

440

## 441 **Conclusion**

442 Our findings suggest that eligibility for cash transfers to support young children may protect the  
443 cognitive health of maternal recipients. This finding is critical since it indicates cash transfers  
444 can make promising interventions to protect cognitive health; and that CSG confers long-term  
445 cognitive health benefits to mothers in addition to children and households at the time of transfer.  
446 Future research should investigate how parity affects this relationship, how this relationship may

447 vary by the actual financial value of cumulative cash transfer receipt, and whether the protective  
448 effects of cash transfers like the CSG extend to later-life cognitive outcomes as beneficiaries age.  
449 Better understanding of the relationship between cash transfers and cognitive ageing is crucial, as  
450 this evidence would allow for policy recommendations, change in cost-benefit arguments and  
451 development of income supplementation programmes to promote healthy cognitive ageing in  
452 low-income settings.

453

## 454 **Data availability**

455 The HAALSI data used in this article are publicly available here:

456 <https://dataverse.harvard.edu/dataverse/haalsi>

457

## 458 **Funding**

459 This current work was supported by U.S. National Institute on Aging (grant number  
460 1R01AG069128); the HAALSI study was supported by the U.S. National Institute on Aging  
461 (grant number P01 AG041710). HAALSI is nested within the Agincourt Health and  
462 Demographic Surveillance System site, which is supported by the University of the  
463 Witwatersrand and Medical Research Council, South Africa, and the Wellcome Trust, UK (grant  
464 numbers 058893/Z/99/A; 069683/Z/02/Z; 085477/Z/08/Z; 085477/B/08/Z). The funding sources  
465 had no role in the study design; in the collection, analysis and interpretation of data; in the  
466 writing of the articles; and in the decision to submit it for publication.

467

## 468 **Acknowledgements**

469 We thank Dr. Audrey Pettifor and Erica Beidelman for their valuable contributions towards this  
470 manuscript.

471

## 472 **Author Contributions**

473 Rishika Chakraborty: formal analysis; methodology; data curation; visualization; writing-  
474 original draft; and writing-review and editing; Lindsay C. Kobayashi: writing- original draft; and  
475 writing-review and editing; Janet Jock: methodology; writing-review and editing; Coady Wing:  
476 methodology; writing-review and editing; Xiwei Chen: data validation; visualization; Meredith  
477 Phillips: writing-review and editing; Lisa Berkman: writing-review and editing; Kathleen Kahn:  
478 writing-review and editing; Chodziwadziwa Whiteson Kabudula: writing-review and editing;  
479 Molly Rosenberg: project conceptualization; funding acquisition; supervision; methodology;  
480 writing - original draft; and writing- review and editing.

481

## 482 **Supplementary data**

483 Supplementary materials are available online:

484 **S1 Fig: Plotting the relationship between all years of CSG eligibility and cognitive function**

485 **z-scores**

486 **S2 Fig: Plotting the relationship between years of CSG eligibility in five-year intervals and**

487 **cognitive function z scores**

488 **S3 Fig: Cognitive function z-scores are similar for those with 1 to 5 and 5.5 to 10 years of**

489 **CSG eligibility while those with greater than 10 years of eligibility had relatively higher**

490 **estimates for cognitive function**



491 **S1 Table: Estimated effects of Child Support Grant eligibility (in years) on cognitive**  
492 **function in Child Support Grant-eligible mothers, Health and Ageing in Africa: A**  
493 **Longitudinal Study of an INDEPTH Community in South Africa, 2014/15**  
494 **S2 Table: Estimated effects of high Child Support Grant eligibility (>8 years) compared to**  
495 **low Child Support Grant eligibility (≤8 years) on cognitive function in Child Support**  
496 **Grant-eligible mothers, Health and Ageing in Africa: A Longitudinal Study of an**  
497 **INDEPTH Community in South Africa, 2014/15**  
498 **S3 Table: Estimated effects of high Child Support Grant eligibility (>12 years) compared to**  
499 **low Child Support Grant eligibility (≤12 years) on cognitive function in Child Support**  
500 **Grant-eligible mothers, Health and Ageing in Africa: A Longitudinal Study of an**  
501 **INDEPTH Community in South Africa, 2014/15**

502

## 503 **References**

- 504 1. Patterson C. World alzheimer report 2018. 2018.  
505 2. Qiu C, Kivipelto M, von Strauss E. Epidemiology of Alzheimer's disease: occurrence,  
506 determinants, and strategies toward intervention. *Dialogues Clin Neurosci*. 2009;11(2):111-28.  
507 3. Guerchet M, Prince M, Prina M. Numbers of people with dementia worldwide: An  
508 update to the estimates in the World Alzheimer Report 2015. 2020.  
509 4. Guerchet MM, Mayston R, Lloyd-Sherlock P, Prince MJ, Aboderin I, Akinyemi R, et al.  
510 Dementia in sub-Saharan Africa: challenges and opportunities. London: Alzheimer's Disease  
511 International; 2017.  
512 5. Mavrodaris A, Powell J, Thorogood M. Prevalences of dementia and cognitive  
513 impairment among older people in sub-Saharan Africa: a systematic review. *Bulletin of the*  
514 *World Health Organization*. 2013;91:773-83.  
515 6. Akinyemi RO, Yaria J, Ojagbemi A, Guerchet M, Okubadejo N, Njamnshi AK, et al.  
516 Dementia in Africa: Current evidence, knowledge gaps, and future directions. *Alzheimers*  
517 *Dement*. 2021.  
518 7. Whalley LJ, Dick FD, McNeill G. A life-course approach to the aetiology of late-onset  
519 dementias. *The Lancet Neurology*. 2006;5(1):87-96.  
520 8. Glymour MM, Manly JJ. Lifecourse social conditions and racial and ethnic patterns of  
521 cognitive aging. *Neuropsychology review*. 2008;18(3):223-54.  
522 9. Dekhtyar S, Wang HX, Scott K, Goodman A, Koupil I, Herlitz A. A Life-Course Study of  
523 Cognitive Reserve in Dementia--From Childhood to Old Age. *Am J Geriatr Psychiatry*.  
524 2015;23(9):885-96.

- 525 10. Scazufca M, Menezes PR, Araya R, Di Rienzo VD, Almeida OP, Gunnell D, et al. Risk  
526 factors across the life course and dementia in a Brazilian population: results from the Sao  
527 Paulo Ageing & Health Study (SPAH). *Int J Epidemiol*. 2008;37(4):879-90.
- 528 11. Ma J, Yang Y, Wan Y, Shen C, Qiu P. The influence of childhood adversities on mid to  
529 late cognitive function: From the perspective of life course. *PLoS One*. 2021;16(8):e0256297.
- 530 12. Wilson RS, Leurgans SE, Boyle PA, Bennett DA. Cognitive decline in prodromal  
531 Alzheimer disease and mild cognitive impairment. *Archives of neurology*. 2011;68(3):351-6.
- 532 13. Turrell G, Lynch JW, Kaplan GA, Everson SA, Helkala E-L, Kauhanen J, et al.  
533 Socioeconomic position across the lifecourse and cognitive function in late middle age. *The*  
534 *Journals of Gerontology Series B: Psychological Sciences and Social Sciences*. 2002;57(1):S43-S51.
- 535 14. Stern Y. Cognitive reserve in ageing and Alzheimer's disease. *The Lancet Neurology*.  
536 2012;11(11):1006-12.
- 537 15. Wilson RS, Scherr PA, Hoganson G, Bienias JL, Evans DA, Bennett DA. Early life  
538 socioeconomic status and late life risk of Alzheimer's disease. *Neuroepidemiology*.  
539 2005;25(1):8-14.
- 540 16. Stern Y. What is cognitive reserve? Theory and research application of the reserve  
541 concept. *Journal of the international neuropsychological society*. 2002;8(3):448-60.
- 542 17. Jefferson AL, Gibbons LE, Rentz DM, Carvalho JO, Manly J, Bennett DA, et al. A life  
543 course model of cognitive activities, socioeconomic status, education, reading ability, and  
544 cognition. *Journal of the American Geriatrics Society*. 2011;59(8):1403-11.
- 545 18. de Jager CA, Joska JA, Hoffman M, Borochowitz KE, Combrinck MI. Dementia in rural  
546 South Africa: A pressing need for epidemiological studies. *S Afr Med J*. 2015;105(3):189-90.
- 547 19. Kahn K, Collinson MA, Gómez-Olivé FX, Mokoena O, Twine R, Mee P, et al. Profile:  
548 Agincourt health and socio-demographic surveillance system. *Int J Epidemiol*. 2012;41(4):988-  
549 1001.
- 550 20. McEwen H, Kannemeyer C, Woolard I. Social assistance grants: analysis of the NIDS  
551 Wave 1 dataset. 2009.
- 552 21. DSD, SASSA, UNICEF. The South African Child Support Grant Impact Assessment:  
553 Evidence from a survey of children, adolescents and their households. Pretoria: UNICEF  
554 South Africa. 2012.
- 555 22. Delany A, Ismail Z, Graham L, Ramkissoo Y. Review of the child support grant: Uses,  
556 implementation and obstacles. Johannesburg: Community Agency for Social Enquiry. 2008.
- 557 23. Case A, Hosegood V, Lund F. The reach and impact of Child Support Grants: evidence  
558 from KwaZulu-Natal. *Development Southern Africa*. 2005;22(4):467-82.
- 559 24. Twine R, Collinson MA, Polzer TJ, Kahn K. Evaluating access to a child-oriented  
560 poverty alleviation intervention in rural South Africa. *Scand J Public Health Suppl*. 2007;69:118-  
561 27.
- 562 25. Handa S, Otchere F, Sirma P, Team TES. More Evidence on the Impact of Government  
563 Social Protection in Sub Saharan Africa: Ghana, Malawi and Zimbabwe. *Development Policy*  
564 *Review*. 2021;n/a(n/a).
- 565 26. Eyal K, Woolard I. Throwing the Book at the CSG, South African Labour and  
566 Development Research Unit. Working Paper series 53; 2011.
- 567 27. Ohrnberger J, Fichera E, Sutton M, Anselmi L. The effect of cash transfers on mental  
568 health—new evidence from South Africa. *BMC public health*. 2020;20(1):1-13.
- 569 28. Patel L. Poverty, Gender and Social Protection: Child Support Grants in Soweto, South  
570 Africa. *Journal of Policy Practice*. 2012;11(1-2):106-20.
- 571 29. Granlund S, Hochfeld T. 'That Child Support Grant Gives Me Powers' – Exploring Social  
572 and Relational Aspects of Cash Transfers in South Africa in Times of Livelihood Change. *The*  
573 *Journal of Development Studies*. 2020;56(6):1230-44.

- 574 30. Aguila E, Kapteyn A, Smith JP. Effects of income supplementation on health of the  
575 poor elderly: The case of Mexico. *Proceedings of the National Academy of Sciences*.  
576 2015;112(1):70-5.
- 577 31. Ayyagari P, Frisvold D. The impact of social security income on cognitive function at  
578 older ages. *American Journal of Health Economics*. 2016;2(4):463-88.
- 579 32. Gómez-Olivé FX, Montana L, Wagner RG, Kabudula CW, Rohr JK, Kahn K, et al. Cohort  
580 Profile: Health and Ageing in Africa: A Longitudinal Study of an INDEPTH Community in  
581 South Africa (HAALSI). *Int J Epidemiol*. 2018;47(3):689-90j.
- 582 33. Gómez-Olivé FX, Angotti N, Houle B, Klipstein-Grobusch K, Kabudula C, Menken J, et  
583 al. Prevalence of HIV among those 15 and older in rural South Africa. *AIDS Care*. 2013;25(9):1122-  
584 8.
- 585 34. Hall K. Child Support Grants South Africa2021 [Available from:  
586 <http://childrencount.uct.ac.za/indicator.php?domain=2&indicator=10>.  
587 35. South African Social Security Agency. Child Support Grant South Africa2021 [Available  
588 from: <https://www.gov.za/services/child-care-social-benefits/child-support-grant>.  
589 36. Department of Health/South Africa, Macro International. South Africa Demographic  
590 and Health Survey 1998. Pretoria, South Africa: Department of Health/South Africa; 2002.
- 591 37. Zembe-Mkabile W, Doherty T, Sanders D, Jackson D, Chopra M, Swanevelder S, et al.  
592 Why do families still not receive the child support grant in South Africa? A longitudinal  
593 analysis of a cohort of families across South Africa. *BMC international health and human  
594 rights*. 2012;12:24-.
- 595 38. Kobayashi LC, Mateen FJ, Montana L, Wagner RG, Kahn K, Tollman SM, et al. Cognitive  
596 function and impairment in older, rural South African adults: evidence from “health and  
597 aging in Africa: a longitudinal study of an INDEPTH community in rural South Africa”.  
598 *Neuroepidemiology*. 2019;52(1-2):32-40.
- 599 39. Bäckman L, Small BJ, Fratiglioni L. Stability of the preclinical episodic memory deficit  
600 in Alzheimer's disease. *Brain*. 2001;124(1):96-102.
- 601 40. Kobayashi LC, Gross AL, Gibbons LE, Tommet D, Sanders RE, Choi S-E, et al. You say  
602 tomato, I say radish: can brief cognitive assessments in the US Health Retirement Study be  
603 harmonized with its International Partner Studies? *The Journals of Gerontology: Series B*.  
604 2020.
- 605 41. Wu Q, Tchetgen Tchetgen EJ, Osypuk TL, White K, Mujahid M, Maria Glymour M.  
606 Combining direct and proxy assessments to reduce attrition bias in a longitudinal study.  
607 *Alzheimer Dis Assoc Disord*. 2013;27(3):207-12.
- 608 42. Mgraya AH, Massawe SN, Kidanto HL, Mgraya HN. Grand multiparity: is it still a risk in  
609 pregnancy? *BMC Pregnancy and Childbirth*. 2013;13(1):241.
- 610 43. Hughes ML, Agrigoroaei S, Jeon M, Bruzzese M, Lachman ME. Change in cognitive  
611 performance from midlife into old age: Findings from the Midlife in the United States  
612 (MIDUS) study. *Journal of the International Neuropsychological Society*. 2018;24(8):805-20.
- 613 44. Ferreira D, Correia R, Nieto A, Machado A, Molina Y, Barroso J. Cognitive decline  
614 before the age of 50 can be detected with sensitive cognitive measures. *Psicothema*.  
615 2015;27(3):216-22.
- 616 45. Whalley LJ, Deary IJ, Appleton CL, Starr JM. Cognitive reserve and the neurobiology  
617 of cognitive aging. *Ageing research reviews*. 2004;3(4):369-82.
- 618 46. Berkman LF. The association between educational attainment and mental status  
619 examinations: of etiologic significance for senile dementias or not? *J Chronic Dis*. 1986;39(3):171-  
620 5.
- 621 47. Richards M, Deary IJ. A life course approach to cognitive reserve: a model for  
622 cognitive aging and development? *Annals of Neurology: Official Journal of the American  
623 Neurological Association and the Child Neurology Society*. 2005;58(4):617-22.

- 624 48. DSD, SASSA, UNICEF. Child Support Grant Evaluation 2010: Qualitative Research  
625 Report. Pretoria: UNICEF South Africa. 2011.
- 626 49. Kats D, Patel MD, Palta P, Meyer ML, Gross AL, Whitsel EA, et al. Social support and  
627 cognition in a community-based cohort: the Atherosclerosis Risk in Communities (ARIC)  
628 study. *Age Ageing*. 2016;45(4):475-80.
- 629 50. Harling G, Kobayashi LC, Farrell MT, Wagner RG, Tollman S, Berkman L. Social contact,  
630 social support, and cognitive health in a population-based study of middle-aged and older  
631 men and women in rural South Africa. *Soc Sci Med*. 2020;260:113167.
- 632 51. Berkman LF. Which influences cognitive function: living alone or being alone? *The*  
633 *Lancet*. 2000;355(9212):1291-2.
- 634 52. Bae JB, Lipnicki DM, Han JW, Sachdev PS, Kim TH, Kwak KP, et al. Does parity matter  
635 in women's risk of dementia? A COSMIC collaboration cohort study. *BMC Med*. 2020;18(1):210.
- 636 53. Bae JB, Lipnicki DM, Han JW, Sachdev PS, Kim TH, Kwak KP, et al. Parity and the risk  
637 of incident dementia: a COSMIC study. *Epidemiol Psychiatr Sci*. 2020;29:e176.
- 638 54. Li FD, He F, Chen TR, Xiao YY, Lin ST, Shen W, et al. Reproductive history and risk of  
639 cognitive impairment in elderly women: a cross-sectional study in eastern China. *J*  
640 *Alzheimers Dis*. 2016;49(1):139-47.
- 641 55. Saenz JL, Díaz-Venegas C, Crimmins EM. Fertility history and cognitive function in  
642 late life: The case of Mexico. *The Journals of Gerontology: Series B*. 2021;76(4):e140-e52.
- 643 56. Parikh NI, Cnattingius S, Dickman PW, Mittleman MA, Ludvigsson JF, Ingelsson E.  
644 Parity and risk of later-life maternal cardiovascular disease. *Am Heart J*. 2010;159(2):215-21.e6.
- 645 57. Rosenberg M, Pettifor A, Nguyen N, Westreich D, Bor J, Bärnighausen T, et al.  
646 Relationship between Receipt of a Social Protection Grant for a Child and Second Pregnancy  
647 Rates among South African Women: A Cohort Study. *PLoS One*. 2015;10(9):e0137352.
- 648 58. Garman EC, Eyal K, Avendano M, Evans-Lacko S, Lund C. Cash transfers and the mental  
649 health of young people: Evidence from South Africa's child support grant. *Soc Sci Med*.  
650 2022;292:114631.
- 651
